# Supplementary material for: Germline TTN variants are enriched in PTEN-wildtype Bannayan–Riley–Ruvalcaba syndrome
Source: PubMed Central journal article supplement (PMC5735137; doi:10.1038/s41525-017-0039-y), 2017-12-18
Supplement: 41525_2017_39_MOESM1_ESM.pdf [file 41525_2017_39_MOESM1_ESM.pdf]

## Supplementary Appendix

### Germline *TTN* Variants are Enriched in *PTEN*-Wildtype Bannayan-Riley-Ruvalcaba Syndrome

Lamis Yehia, Ying Ni, and Charis Eng

## **SUPPLEMENTARY METHODS**

### ***In vitro* scratch migration assay**

Cells were grown overnight and migration assay performed according to Liang et al.,<sup>1</sup> with the minor variation of creating scratches on the cell monolayer using a p10 pipet tip. We measured migration distance after 24 hours. Cells were photographed under 10x magnification and distances measured in triplicate fields of view. Images were taken using a Leica DMI3000B manual inverted microscope (Leica, Buffalo Grove, IL).

### **Reference**

1. Liang, C.C., Park, A.Y. & Guan, J.L. 2007. In vitro scratch assay: a convenient and inexpensive method for analysis of cell migration in vitro. *Nat Protoc* **2**:329-33. 10.1038/nprot.2007.30.

**Supplementary Table 1.** Clinical and demographic characteristics of 14 unrelated probands with classic BRRS features

| Subject  | Age at consent | Gender | Macrocephaly  | Penile freckling | Neuro-psychological     | Benign overgrowths and skin features                                           | Other phenotypes and incidental findings                                    |
|----------|----------------|--------|---------------|------------------|-------------------------|--------------------------------------------------------------------------------|-----------------------------------------------------------------------------|
| CCF00162 | 33             | M      | Yes (59 cm)   | Yes              | Unknown                 | Lipoma, hemangioma (NOS)                                                       | Prominent Schwalbe's lines                                                  |
| CCF02011 | 1              | M      | Yes (59 cm)   | Yes              | Developmental delay/ASD | Unknown                                                                        | Unknown                                                                     |
| CCF06949 | 51             | M      | Yes (58.5 cm) | Yes              | Developmental delay/ASD | Skin hemangioma                                                                | Obsessive compulsive disorder                                               |
| CCF07265 | 68             | M      | Yes (61 cm)   | Yes              | Unknown                 | Mucocutaneous lip pigmentation                                                 | Prostate cancer (age 65)                                                    |
| CCF06673 | 15             | M      | No            | Yes              | Unknown                 | Skin fibroma                                                                   | Follicular variant papillary thyroid cancer (age 13)                        |
| CCF00155 | 24             | M      | No            | Yes              | Developmental delay/ASD | Benign thyroid nodule, papillomatous papules (NOS), arteriovenous malformation | Unknown                                                                     |
| CCF04693 | 12             | M      | No            | Yes              | Developmental delay/ASD | Juvenile polyp (n=1), intestinal polyposis (>10)                               | Café-au-lait macules, inguinal freckling, multiple naevi, hyperflexibility  |
| CCF07445 | 38             | M      | Yes (59.2 cm) | Yes              | Unknown                 | Trichilemmoma, acral keratoses, skin tag                                       | Unknown                                                                     |
| CCF01021 | 31             | M      | Yes (63.5 cm) | Yes              | Mental retardation      | Skin hemangioma, papillomatous papules (mucosa)                                | Hypotonia, hydrocephalus                                                    |
| CCF02423 | 45             | M      | Yes (59 cm)   | Yes              | Developmental delay/ASD | Unknown                                                                        | Melanosis coli, melanoma in situ (age 41), renal clear cell cancer (age 42) |
| CCF05285 | 46             | M      | Yes (59 cm)   | Yes              | Unknown                 | Skin fibroma, acral keratoses, papillomatous papules, polyps                   | Thyroid cancer (age 23)                                                     |
| CCF06892 | 53             | M      | Yes (59 cm)   | Yes              | Unknown                 | Trichilemmoma, acral keratoses, skin hemangioma, polyps                        | Unknown                                                                     |
| CCF08441 | 59             | M      | No            | Yes              | Unknown                 | Lipoma, skin fibroma, skin, vascular, and spinal hemangiomas, thyroid nodule   | Melanosis coli, hearing loss, trigeminal neuralgia                          |
| CCF06480 | 23             | M      | Yes (62.3 cm) | Yes              | Developmental delay/ASD | Unknown                                                                        | Unknown                                                                     |

*Abbreviations:* M, male; cm, centimeters; NOS, not otherwise specified.

**Supplementary Table 2.** Shared genes with germline variants in at least 2 classic BRRS patients (n=14)

| Gene                    | Description                       | Patients | Variants                                        | MutationTaster                     |
|-------------------------|-----------------------------------|----------|-------------------------------------------------|------------------------------------|
| <i>TTN</i>              | Titin                             | CCF00162 | c.66187G>C, p.V22063L                           | Disease-causing                    |
|                         |                                   | CCF02011 | c.33856G>A, p.E11286K                           | Disease-causing                    |
|                         |                                   | CCF06949 | c.28549G>A, p.V9517M                            | Disease-causing                    |
|                         |                                   | CCF07265 | c.92488G>A, p.V30830I                           | Disease-causing                    |
|                         |                                   | CCF06673 | c.23497G>C, p.G7833R                            | Disease-causing                    |
|                         |                                   | CCF01021 | c.15286T>C, p.C5096R                            | Disease-causing                    |
|                         |                                   | CCF02423 | c.29317G>A, p.A9773T                            | Disease-causing                    |
|                         |                                   | CCF07445 | c.68770G>A, p.A22924T<br>c.104575C>T, p.R34859W | Disease-causing<br>Disease-causing |
| <i>TRAP1</i>            | TNF receptor-associated protein 1 | CCF00155 | c.512A>C, p.N171T                               | Disease-causing                    |
|                         |                                   | CCF00162 | c.778G>T, p.D260Y                               | Disease-causing                    |
|                         |                                   | CCF04693 | c.591C>G, p.I197M                               | Disease-causing                    |
| <i>DNAH11</i>           | Dynein Axonemal Heavy Chain 11    | CCF00162 | c.4367C>T, p.A1456V                             | Disease-causing                    |
|                         |                                   | CCF08441 | c.11249C>T, p.A3750V                            | Disease-causing                    |
| <i>FRAS1</i>            | Fraser Syndrome 1                 | CCF00162 | c.7988C>T, p.A2663V                             | Disease-causing                    |
|                         |                                   | CCF07265 | c.4273G>A, p.G1425R                             | Disease-causing                    |
| <i>FRMD6</i>            | FERM Domain Containing 6          | CCF05285 | c.1187G>C, p.R396P                              | Disease-causing                    |
|                         |                                   | CCF06892 | c.1763A>C, p.Q588P                              | Disease-causing                    |
| <i>HEXA<sup>a</sup></i> | Hexosaminidase Subunit Alpha      | CCF07265 | c.805G>A, p.G269S                               | Disease-causing                    |
|                         |                                   | CCF02423 | c.805G>A, p.G269S                               | Disease-causing                    |
| <i>ITGA7</i>            | Integrin Subunit Alpha 7          | CCF06892 | c.473A>C, p.D158A                               | Disease-causing                    |
|                         |                                   | CCF02423 | c.1345C>T, p.R449C                              | Disease-causing                    |
| <i>LTA4H</i>            | Leukotriene A4 Hydrolase          | CCF06673 | c.164T>G, p.L55W                                | Disease-causing                    |
|                         |                                   | CCF02423 | c.1096C>G, p.L366V                              | Disease-causing                    |
| <i>PXDN</i>             | Peroxidasin                       | CCF04693 | c.2021G>A, p.R674Q                              | Disease-causing                    |
|                         |                                   | CCF05285 | c.2621G>A, p.R874H                              | Disease-causing                    |
| <i>SEZ6L2</i>           | Seizure Related 6 Homolog Like 2  | CCF06673 | c.1855C>T, p.P619S                              | Disease-causing                    |
|                         |                                   | CCF08441 | c.391G>A, p.A131T                               | Disease-causing                    |
| <i>THBS2</i>            | Thrombospondin 2                  | CCF05285 | c.3242C>T, p.A1081V                             | Disease-causing                    |
|                         |                                   | CCF04693 | c.1105G>A, p.E369K                              | Disease-causing                    |

<sup>a</sup>Known disease mutation (rs121907954, HGMD ID CM890061) for Tay-Sachs disease (TSD). TSD is autosomal recessive and both patients were heterozygous for the mutation.

Gene transcripts used to call variants: *TTN* (NM\_001267550), *TRAP1* (NM\_016292), *DNAH11* (NM\_003777), *FRAS1* (NM\_025074), *FRMD6* (NM\_152330), *HEXA* (NM\_000520), *ITGA7* (NM\_001144997), *LTA4H* (NM\_000895), *PXDN* (NM\_012293), *SEZ6L2* (NM\_201575), *THBS2* (NM\_003247).

**Supplementary Table 3.** Clinical and demographic characteristics of 21 unrelated probands with classic BRRS

| Subject  | Age at consent | Gender | Macrocephaly  | Penile freckling | Neuro-psychological     | Other phenotypes                                                                                                                             |
|----------|----------------|--------|---------------|------------------|-------------------------|----------------------------------------------------------------------------------------------------------------------------------------------|
| CCF02153 | 3              | M      | Yes (57.2 cm) | Yes              | Developmental delay/ASD | Not observed                                                                                                                                 |
| CCF06523 | 26             | M      | No (54 cm)    | Yes              | Unknown                 | Lipoma                                                                                                                                       |
| CCF02289 | 46             | M      | No (55.5 cm)  | Yes              | Unknown                 | Lipoma                                                                                                                                       |
| CCF00583 | 62             | F      | Yes           | NA               | Developmental delay/ASD | Thyroid goiter, fibrocystic breast disease, papillomatous papules, lipoma, uterine fibroids, renal cell cancer (age 62)                      |
| CCF00672 | 12             | M      | Yes           | Yes              | Developmental delay/ASD | Not observed                                                                                                                                 |
| CCF03468 | 1              | F      | Yes (48 cm)   | NA               | Developmental delay/ASD | Lipoma, hemangioma, thyroid nodule, hypotonia                                                                                                |
| CCF04432 | 5              | M      | Yes (56 cm)   | Yes              | Developmental delay/ASD | Not observed                                                                                                                                 |
| CCF04433 | 13             | M      | Yes (59 cm)   | Yes              | Developmental delay/ASD | Not observed                                                                                                                                 |
| CCF04532 | 37             | M      | No            | Yes              | No                      | Lipoma, GI polyps, rectal cancer (age 26)                                                                                                    |
| CCF04588 | 35             | F      | Yes (62 cm)   | NA               | Developmental delay/ASD | Lipoma, endometrial cancer (age 35)                                                                                                          |
| CCF05173 | 20             | M      | Yes (61.2 cm) | Yes              | Developmental delay/ASD | Not observed                                                                                                                                 |
| CCF07875 | 5              | M      | Yes (56.4)    | Yes              | No                      | Not observed                                                                                                                                 |
| CCF00006 | 60             | M      | Yes (63.2)    | Yes              | Unknown                 | Thyroid nodule, papillomatous papules, lipoma, fibroma, hemangioma, pectus excavatum                                                         |
| CCF00051 | 37             | M      | Yes (59.3)    | Yes              | No                      | Trichilemmoma, papillomatous papules, lipoma, GI polyps                                                                                      |
| CCF00241 | 16             | M      | Yes (59 cm)   | Yes              | No                      | Not observed                                                                                                                                 |
| CCF00123 | 10             | F      | Yes           | NA               | Developmental delay/ASD | Lipoma                                                                                                                                       |
| CCF01646 | 72             | M      | No (54.7 cm)  | Yes              | No                      | Papillary thyroid cancer (unknown age)                                                                                                       |
| CCF02160 | 4              | M      | Yes           | Yes              | Developmental delay/ASD | Hemangioma                                                                                                                                   |
| CCF03519 | 14             | M      | No (57.5)     | Yes              | Unknown                 | Not observed                                                                                                                                 |
| CCF05149 | 14             | M      | Yes (58.5)    | Yes              | No                      | GI polyps                                                                                                                                    |
| CCF08133 | 71             | M      | Yes (59.6)    | Yes              | Unknown                 | Follicular variant papillary thyroid cancer (age 68), goiter, benign breast disease, lipoma, visceral hemangioma, renal cell cancer (age 64) |

*Abbreviations:* M, male; F, female; cm, centimeter; NA, not applicable; ASD, autism spectrum disorder; GI, gastrointestinal.

**Supplementary Table 4.** Shared genes with germline variants in at least 3 classic BRRS patients (n=35)

| Gene   | Description                                     | Patients | Variants                          | MutationTaster  |
|--------|-------------------------------------------------|----------|-----------------------------------|-----------------|
| AK9    | Adenylate Kinase 9                              | CCF02153 | c.3895C>T, p.R1299W               | Disease-causing |
|        |                                                 | CCF03468 | c.4204C>T, p.R1402C               | Disease-causing |
|        |                                                 | CCF06523 | c.4814A>C, p.K1605T               | Polymorphism    |
|        |                                                 | CCF04693 | c.3419G>T, p.G1140V               | Disease-causing |
| ANKAR  | Ankyrin And Armadillo Repeat Containing         | CCF00241 | c.3044T>C, p.V1015A               | Disease-causing |
|        |                                                 | CCF05149 | c.3058_3061delAAGG, p.K1020Tfs*22 | Disease-causing |
|        |                                                 | CCF04433 | c.4258C>T, p.L1420F               | Polymorphism    |
| CDH24  | Cadherin 24                                     | CCF04588 | c.1387G>A, p.V463M                | Disease-causing |
|        |                                                 | CCF00672 | c.2264C>A, p.P755H                | Polymorphism    |
|        |                                                 | CCF05285 | c.622G>T, p.V208L                 | Polymorphism    |
| ITPR3  | Inositol 1,4,5-Trisphosphate Receptor Type 3    | CCF00051 | c.4475A>T, p.Q1492L               | Disease-causing |
|        |                                                 | CCF00672 | c.6350A>G, p.Y2117C               | Disease-causing |
|        |                                                 | CCF06673 | c.309A>T, p.Q103H                 | Disease-causing |
| SSPO   | SCO-Spondin                                     | CCF00241 | c.7586G>C, p.R2529P               | ND              |
|        |                                                 | CCF01646 | c.8311+1G>A                       | ND              |
|        |                                                 | CCF02153 | c.6959C>T, p.T2320I               | ND              |
| STARD9 | StAR Related Lipid Transfer Domain Containing 9 | CCF03468 | c.986G>A, p.R329Q                 | Polymorphism    |
|        |                                                 | CCF02153 | c.13808G>A, p.R4603Q              | Disease-causing |
|        |                                                 | CCF02289 | c.10034C>T, p. P3345L             | Disease-causing |

Gene transcripts used to call variants: AK9 (NM\_001145128), ANKAR (NM\_144708), CDH24 (NM\_144985), ITPR3 (NM\_002224), SSPO (NM\_198455), STARD9 (NM\_020759).

Abbreviations: ND, not determined. MutationTaster annotation problem (No start ATG exon found).

**Supplementary Table 5.** Exome sequencing and *TTN*-targeted sequencing identifies additional *TTN* germline variants in 37/231 (16%)

BRRS-like and CS/CS-like patients

| Subject  | Genomic position <sup>a</sup>                               | Exon             | Variant                                 | Protein alteration                 | Region                     | <i>In silico</i> predictions <sup>b</sup> | Protein stability <sup>c</sup>                                                                                             | NHLBI-ESP <sup>d</sup>           | 1000G <sup>d</sup> | ExAC <sup>d</sup>                                                                         |
|----------|-------------------------------------------------------------|------------------|-----------------------------------------|------------------------------------|----------------------------|-------------------------------------------|----------------------------------------------------------------------------------------------------------------------------|----------------------------------|--------------------|-------------------------------------------------------------------------------------------|
| CCF00627 | Chr. 2: 179598073                                           | 54               | c.15947C>T                              | p.A5316V                           | I-band                     | Damaging                                  | Decreased ( $\Delta\Delta G = 0.17$ )                                                                                      | 0                                | 0                  | 0                                                                                         |
| CCF01065 | Chr. 2: 179640730                                           | 28               | c.5861C>A                               | p. P1954Q                          | I-band                     | Damaging                                  | Decreased ( $\Delta\Delta G = -0.42$ )                                                                                     | 0                                | 0                  | 0                                                                                         |
| CCF01705 | Chr. 2: 179571287                                           | 102              | c.29314G>A                              | p.V9772M                           | I-band                     | Damaging                                  | Decreased ( $\Delta\Delta G = -0.33$ )                                                                                     | 0                                | 2/5008 (0.0004)    | 8/120748 (6.625e-05), 0 hom                                                               |
| CCF02331 | Chr. 2: 179597669                                           | 55               | c.16234G>T                              | p.A5412S                           | I-band                     | Damaging                                  | Decreased ( $\Delta\Delta G = -0.83$ )                                                                                     | 0                                | 0                  | 0                                                                                         |
| CCF02413 | Chr. 2: 179451362                                           | 308              | c.64266A>C                              | p.K21422N                          | A-band                     | Damaging                                  | Decreased ( $\Delta\Delta G = -0.59$ )                                                                                     | 0                                | 0                  | 0                                                                                         |
| CCF02462 | Chr. 2: 179597782<br>Chr. 2: 179424184<br>Chr. 2: 179398570 | 55<br>326<br>358 | c.16121G>A<br>c.86675G>C<br>c.102772C>A | p.C5374Y<br>p.W28892S<br>p.P34258T | I-band<br>A-band<br>M-band | Damaging                                  | Decreased ( $\Delta\Delta G = -1.13$ )<br>Decreased ( $\Delta\Delta G = -2.41$ )<br>Decreased ( $\Delta\Delta G = -1.56$ ) | T=1/C=12165 (0.000082)<br>0<br>0 | 0<br>0<br>0        | 10/118780 (8.419e-05), 0 hom<br>1/120638 (8.289e-06), 0 hom<br>9/120642 (7.46e-05), 0 hom |
| CCF02784 | Chr. 2: 179437711                                           | 326              | c.73148C>T                              | p. S24383L                         | A-band                     | Damaging                                  | Increased ( $\Delta\Delta G = 0.64$ )                                                                                      | 0                                | 0                  | 3/119376 (2.513e-05), 0 hom                                                               |
| CCF03220 | Chr. 2: 179578746                                           | 92               | c.26639T>G                              | p.F8880C                           | I-band                     | Damaging                                  | Decreased ( $\Delta\Delta G = -2.47$ )                                                                                     | 0                                | 0                  | 0                                                                                         |
| CCF03454 | Chr. 2: 179476673                                           | 268              | c.50363T>C                              | p.I16788T                          | A-band                     | Damaging                                  | Decreased ( $\Delta\Delta G = -1.53$ )                                                                                     | 0                                | 2/5008 (0.0004)    | 108/117992 (0.0009153), 2 hom                                                             |
| CCF04477 | Chr. 2: 179466465                                           | 286              | c.55352G>A                              | p.R18451Q                          | A-band                     | Damaging                                  | Decreased ( $\Delta\Delta G = -1.47$ )                                                                                     | 0                                | 0                  | 4/119006 (3.361e-05), 0 hom                                                               |
| CCF04642 | Chr. 2: 179428639                                           | 326              | c.82220T>C                              | p.I27407T                          | A-band                     | Damaging                                  | Decreased ( $\Delta\Delta G = -2.07$ )                                                                                     | G=1/A=11887 (0.000084)           | 1/5008 (0.0002)    | 4/120632 (3.316e-05), 0 hom                                                               |
| CCF04765 | Chr. 2: 179457732                                           | 300              | c.59114G>A                              | p.R19705H                          | A-band                     | Damaging                                  | Decreased ( $\Delta\Delta G = -0.82$ )                                                                                     | 0                                | 0                  | 3/120538 (2.489e-05), 0 hom                                                               |
| CCF04880 | Chr. 2: 179490087                                           | 241              | c.44461A>T                              | p.T14821S                          | I-band                     | Damaging                                  | Decreased ( $\Delta\Delta G = -0.20$ )                                                                                     | 0                                | 0                  | 0                                                                                         |

| Subject  | Genomic position <sup>a</sup>          | Exon       | Variant                  | Protein alteration     | Region           | <i>In silico</i> predictions <sup>b</sup> | Protein stability <sup>c</sup>                                                   | NHLBI-ESP <sup>d</sup>      | 1000G <sup>d</sup> | ExAC <sup>d</sup>                |
|----------|----------------------------------------|------------|--------------------------|------------------------|------------------|-------------------------------------------|----------------------------------------------------------------------------------|-----------------------------|--------------------|----------------------------------|
| CCF05254 | Chr. 2: 179437076                      | 326        | c.73783G>A               | p.A24595T              | A-band           | Damaging                                  | Decreased ( $\Delta\Delta G = -1.09$ )                                           | 0                           | 0                  | 22/120124 (0.0001831), 0 hom     |
| CCF05417 | Chr. 2: 179431234                      | 326        | c.79625G>A               | p.G26542D              | A-band           | Damaging                                  | Decreased ( $\Delta\Delta G = -0.64$ )                                           | 0                           | 0                  | 0                                |
| CCF05501 | Chr. 2: 179474599                      | 272        | c.51551T>C               | p.I17184T              | A-band           | Damaging                                  | Decreased ( $\Delta\Delta G = -0.46$ )                                           | 0                           | 0                  | 7/120698 (5.8e-05), 0 hom        |
| CCF06238 | Chr. 2: 179633649                      | 38         | c.8914A>T                | p.T2972S               | I-band           | Damaging                                  | Decreased ( $\Delta\Delta G = 0.03$ )                                            | 0                           | 0                  | 0                                |
| CCF06407 | Chr. 2: 179501156                      | 225        | c.41298A>C               | p.E13766D              | I-band           | Damaging                                  | Decreased ( $\Delta\Delta G = -0.15$ )                                           | 0                           | 1/5008 (0.0002)    | 3/118050 (2.541e-05), 0 hom      |
| CCF06705 | Chr. 2: 179429212                      | 326        | c.81647G>A               | p.R27216H              | A-band           | Damaging                                  | Decreased ( $\Delta\Delta G = -1.57$ )                                           | T=1/C=11937 (0.000084)      | 0                  | 5/111944 (4.467e-05), 0 hom      |
| CCF06822 | Chr. 2: 179395221                      | 358        | c.106121T>A              | p.F35374Y              | M-band           | Damaging                                  | Decreased ( $\Delta\Delta G = -0.57$ )                                           | 0                           | 0                  | 19/120742 (0.0001574), 0 hom     |
| CCF06990 | Chr. 2: 179593302                      | 66         | c.19351G>A               | p.D6451N               | I-band           | Damaging                                  | Decreased ( $\Delta\Delta G = -0.36$ )                                           | 0                           | 0                  | 1/118128 (8.465e-06), 0 hom      |
| CCF07007 | Chr. 2: 179600517                      | 50         | c.14656G>T               | p.D4886Y               | I-band           | Damaging                                  | Increased ( $\Delta\Delta G = 0.39$ )                                            | 0                           | 0                  | 0                                |
| CCF07321 | Chr. 2: 179403903                      | 353        | c.98759G>A               | p.R32920Q              | A-band           | Damaging                                  | Decreased ( $\Delta\Delta G = -2.14$ )                                           | 0                           | 0                  | 6/120614 (4.975e-05), 0 hom      |
| CCF07532 | Chr. 2: 179454006<br>Chr. 2: 179434925 | 304<br>326 | c.62446C>T<br>c.75934G>A | p.P20816S<br>p.E25312K | A-band<br>A-band | Damaging                                  | Decreased ( $\Delta\Delta G = -0.59$ )<br>Decreased ( $\Delta\Delta G = -0.44$ ) | 0<br>0                      | 0<br>0             | 0<br>3/120332 (2.493e-05), 0 hom |
| CCF08384 | Chr. 2: 179467114                      | 283        | c.55015C>A               | p.L18339M              | A-band           | Damaging                                  | Decreased ( $\Delta\Delta G = -0.87$ )                                           | 0                           | 0                  | 0                                |
| CCF02958 | Chr. 2: 179478814                      | 262        | c.49310T>A               | p.V16437D              | A-band           | Damaging                                  | Decreased ( $\Delta\Delta G = -1.60$ )                                           | 0                           | 0                  | 3/119324 (2.514e-05), 0 hom      |
| CCF04542 | Chr. 2: 179454746<br>Chr. 2: 179498006 | 304<br>233 | c.61706G>A<br>c.42994G>A | p.R20569K<br>p.V14332I | A-band<br>I-band | Damaging                                  | Decreased ( $\Delta\Delta G = -1.01$ )<br>Decreased ( $\Delta\Delta G = -0.14$ ) | T=1/C=12045 (0.000083)<br>0 | 0<br>0             | 1/120078 (8.328e-06), 0 hom<br>0 |
| CCF07330 | Chr. 2: 179457506<br>Chr. 2: 179494976 | 300<br>239 | c.59340G>T<br>c.44273G>A | p.R19780S<br>p.R14758Q | A-band<br>I-band | Damaging                                  | Decreased ( $\Delta\Delta G = -2.36$ )<br>Decreased ( $\Delta\Delta G = -0.88$ ) | 0<br>0                      | 0<br>0             | 0<br>3/120386 (2.492e-05), 0 hom |



| Subject  | Genomic position <sup>a</sup>          | Exon       | Variant                  | Protein alteration     | Region           | <i>In silico</i> predictions <sup>b</sup> | Protein stability <sup>c</sup>                                                   | NHLBI-ESP <sup>d</sup>      | 1000G <sup>d</sup> | ExAC <sup>d</sup>                |
|----------|----------------------------------------|------------|--------------------------|------------------------|------------------|-------------------------------------------|----------------------------------------------------------------------------------|-----------------------------|--------------------|----------------------------------|
| CCF06063 | Chr. 2: 179584437                      | 82         | c.23782G>C               | p.E7928Q               | I-band           | Damaging                                  | Decreased ( $\Delta\Delta G = -0.58$ )                                           | 0                           | 0                  | 2/120682 (1.657e-05), 0 hom      |
| CCF04885 | Chr. 2: 179571661                      | 101        | c.29062G>C               | p.A9688P               | I-band           | Damaging                                  | Decreased ( $\Delta\Delta G = -2.24$ )                                           | 0                           | 0                  | 3/91796 (3.268e-05), 0 hom       |
| CCF05099 | Chr. 2: 179566951<br>Chr. 2: 179459286 | 108<br>296 | c.30455G>A<br>c.57935G>A | p.R10152Q<br>p.G19312D | I-band<br>A-band | Damaging                                  | Decreased ( $\Delta\Delta G = -1.49$ )<br>Decreased ( $\Delta\Delta G = -1.84$ ) | T=1/C=12231 (0.000082)<br>0 | 0<br>0             | 4/120716 (3.314e-05), 2 hom<br>0 |
| CCF05436 | Chr. 2: 179408134                      | 347        | c.96566A>T               | p.E32189V              | A-band           | Damaging                                  | Increased ( $\Delta\Delta G = -0.14$ )                                           | 0                           | 0                  | 0                                |
| CCF00102 | Chr. 2: 179577926                      | 93         | c.26935A>C               | p.N8979H               | I-band           | Damaging                                  | Increased ( $\Delta\Delta G = 0.24$ )                                            | G=1/T=12263 (0.000082)      | 0                  | 18/117982 (0.0001526), 0 hom     |
| CCF06614 | Chr. 2: 179473603                      | 274        | c.52135G>C               | p.E17379Q              | A-band           | Damaging                                  | Decreased ( $\Delta\Delta G = -1.67$ )                                           | 0                           | 0                  | 0                                |
| CCF06604 | Chr. 2: 179432900                      | 326        | c.77959C>G               | p.P25987A              | A-band           | Damaging                                  | Decreased ( $\Delta\Delta G = -1.36$ )                                           | 0                           | 0                  | 1/120674 (8.287e-06), 0 hom      |
| CCF01767 | Chr. 2: 179397940                      | 358        | c.103402G>A              | p.E34468K              | M-band           | Damaging                                  | Decreased ( $\Delta\Delta G = -0.86$ )                                           | 0                           | 0                  | 1/120682 (8.286e-06), 0 hom      |
| CCF07575 | Chr. 2: 179414752                      | 337        | c.91813T>A               | p. S30605T             | A-band           | Damaging                                  | Increased ( $\Delta\Delta G = 0.60$ )                                            | 0                           | 0                  | 0                                |

<sup>a</sup>Genomic positions are according to the human reference haploid genome sequence, hg19 and variants reported corresponding to *TTN* transcript NM\_001267550.

<sup>b</sup>Predicted through a combination of SIFT, MutationTaster, and PolyPhen-2 (see Materials and Methods).

<sup>c</sup>Predicted through I-Mutant 2.0 program using the difference in the Gibbs free energy values,  $\Delta\Delta G = \Delta G$  (mutant protein) -  $\Delta G$  (Wildtype protein) in Kcal/mole. The sign of  $\Delta\Delta G$  predicts protein stability.

<sup>d</sup>Allele frequency data was extracted from the National Heart, Lung, and Blood Institute (NHLBI) Exome Sequencing Project (ESP) Exome Variant Server (<http://evs.gs.washington.edu/EVS/>) v.0.0.28, 1000 Genomes Project (<http://www.internationalgenome.org>), and Exome Aggregation Consortium (ExAC), Cambridge, MA (<http://exac.broadinstitute.org>) all last accessed August 19, 2017.

**Supplementary Table 6.** *TTN* variants identified in an independent series of non-BRRS patients (n=45)

| Subject | Variant <sup>a</sup>                            | Region           | <i>In silico</i> predictions <sup>b</sup> | NHLBI-ESP <sup>c</sup>    | 1000G <sup>c</sup>      | ExAC <sup>c</sup>                                                |
|---------|-------------------------------------------------|------------------|-------------------------------------------|---------------------------|-------------------------|------------------------------------------------------------------|
| 2283    | c.25126C>T, p.P8376S                            | I-band           | Damaging                                  | A=1/G=11905<br>(0.000084) | 0                       | 13/118104 (0.0001101),<br>0 hom                                  |
| 3083    | c.98867T>C, p.M32956T                           | A-band           | Damaging                                  | 0                         | 0                       | 0                                                                |
| 4367    | c.94524T>G, p.D31508E                           | A-band           | Damaging                                  | 0                         | 0                       | 1/112068 (8.923e-06),<br>0 hom                                   |
| 4506    | c.99966G>T, p.W33322C<br>c.103471G>A, p.E34491K | A-band<br>M-band | Damaging                                  | 0<br>0                    | 0<br>1/5008<br>(0.0002) | 5/118208 (4.23e-05),<br>0 hom<br>1/120726 (8.283e-06),<br>0 hom  |
| 8413    | c.23734G>A, p.V7912M                            | I-band           | Damaging                                  | 0                         | 0                       | 0                                                                |
| 9691    | c.5132C>T, p.S1711F<br>c.43019T>C, p.I14340T    | I-band<br>I-band | Damaging                                  | 0<br>0                    | 0<br>0                  | 2/121144 (1.651e-05),<br>0 hom<br>1/120294 (8.313e-06),<br>0 hom |

<sup>a</sup>Genomic positions are according to the human reference haploid genome sequence, hg19 and variants reported corresponding to *TTN* transcript NM\_001267550.

<sup>b</sup>Predicted through a combination of SIFT, MutationTaster, and PolyPhen-2 (see Materials and Methods).

<sup>c</sup>Allele frequency data was extracted from the National Heart, Lung, and Blood Institute (NHLBI) Exome Sequencing Project (ESP) Exome Variant Server (<http://evs.gs.washington.edu/EVS/>) v.0.0.28, 1000 Genomes Project (<http://www.internationalgenome.org>), and Exome Aggregation Consortium (ExAC), Cambridge, MA (<http://exac.broadinstitute.org>) all last accessed September 3, 2017.

**Supplementary Table 7.** International Cowden Consortium (ICC) operational diagnostic criteria

| <u>Pathognomonic</u><br>Adult Lhermitte-Duclos disease<br>Mucocutaneous lesions<br>Trichilemmomas, facial<br>Acral keratoses<br>Papillomatous papules<br>Mucosal lesions                                                                                                                                                                                                                                                                                                       | <u>Major</u><br>Breast cancer<br>Thyroid cancer (nonmedullary)<br>Macrocephaly (i.e., $\geq$ 97th percentile)<br>Endometrial cancer | <u>Minor</u><br>Other thyroid lesions (eg, adenoma, multinodular goiter)<br>Mental retardation (i.e., $\text{IQ} \leq 75$ )<br>GI hamartomas<br>Fibrocystic breast disease<br>Lipomas<br>Fibromas<br>Genitourinary tumors (especially renal cell carcinoma)<br>Genitourinary malformations<br>Uterine fibroids |
|--------------------------------------------------------------------------------------------------------------------------------------------------------------------------------------------------------------------------------------------------------------------------------------------------------------------------------------------------------------------------------------------------------------------------------------------------------------------------------|-------------------------------------------------------------------------------------------------------------------------------------|----------------------------------------------------------------------------------------------------------------------------------------------------------------------------------------------------------------------------------------------------------------------------------------------------------------|
| <u>Operational diagnosis in an individual</u><br>Any of following:<br>Mucocutaneous lesions alone, if $\geq$ six facial papules (three of which must be trichilemmomas)<br>Cutaneous facial papules and oral mucosal papillomatosis<br>Oral mucosal papillomatosis and acral keratoses<br>$\geq$ Six palmoplantar keratoses<br>$\geq$ Two major criteria (one of which must be macrocephaly or LDD)<br>One major and $\geq$ three minor criteria<br>$\geq$ Four minor criteria |                                                                                                                                     |                                                                                                                                                                                                                                                                                                                |
| <u>Operational diagnosis in a family where one individual is diagnostic for CS</u><br>Any one pathognomonic criterion<br>Any one major criteria $\pm$ minor criteria<br>Two minor criteria<br>History of Bannayan-Riley-Ruvalcaba syndrome                                                                                                                                                                                                                                     |                                                                                                                                     |                                                                                                                                                                                                                                                                                                                |

*Abbreviations:* LDD, Lhermitte-Duclos Disease; CS, Cowden syndrome

**Supplementary Table 8.** Primer sequences and PCR cycling conditions of *TTN* I-band exons

| Amplicon | Exon    | Forward Primer                 | Reverse Primer                | Annealing Temperature (°C) | Amplicon Size (bp) |
|----------|---------|--------------------------------|-------------------------------|----------------------------|--------------------|
| 1        | 147     | CATGTGTGTTCTTATTGTGTATCTGC     | GAACATCGTTAGAAGTAAATATGTAAGT  | 63.5                       | 417                |
| 2        | 149     | ACTTATATTACTGCTGTGTCTACTTG     | AGTCAGAAATGACGAATGTGAAT       | 56.5                       | 286                |
| 3        | 158-159 | CGTTCATCTTGTTAGATGCC           | TGGCATGTTAGGCTTTTATAAGAG      | 56.5                       | 515                |
| 4        | 160-161 | ATTCTAGCCACTAATTTGCCTC         | CCTCTGGTTGTATCAGGTT           | 55.5                       | 559                |
| 5        | 161-162 | ATATAACACCAATGATCCACTCTGAA     | AACATTAGAGGTTGTGAGAATGTATATTA | 56.5                       | 500                |
| 6        | 163     | AAGTCCCACACATATAATATACAAAGATAA | ACTGACTCAACTATCTTTCATGTGTATAA | 56.5                       | 473                |
| 7        | 164-165 | CCAAGAAAACAGCCGCTTA            | GAAACTTCCTGTGGAACCTCA         | 56.5                       | 731                |
| 8        | 166-167 | TGGTTATATTTCTAACTTATTGTGGTTAC  | ATTTAGAAGTTACAAGAATCAACACAATC | 56.5                       | 449                |
| 9        | 167-168 | ACCATGCTCTCAGGGTC              | GCAAGAGTCAACACAGACA           | 62                         | 504                |
| 10       | 169-171 | CTGAAACACCACCTATTATGGGAA       | AGGCATTATGAAGACCACTAGAA       | 63.2                       | 698                |
| 11       | 212-213 | GTATGTATATCTTACATCTCACAACCTTG  | TATTTGAAGACAGAATCAGGCCTTA     | 62                         | 781                |
| 12       | 214-215 | CCCATGAAATCTAAGATGAAGCTC       | AGGAATATTGTCCTGTAAATGCT       | 62.5                       | 597                |
| 13       | 216     | TGAATAATCTAATTAATAGGCAGTTCAAGT | CATACAAATGGGAACAGACATACTAC    | 62                         | 374                |

*PCR cycling conditions:*

|           |                                                    |
|-----------|----------------------------------------------------|
|           | 95°C-10 minutes                                    |
| 37 cycles | 95°C-30s<br>annealing temp°C-40s<br>72°C-1 min 20s |
|           | 72°C-10 min<br>4°C-∞                               |

**Supplementary Figure 1.** Pedigree and clinical phenotypes of Family CCF01021 with an identified *TTN* variant

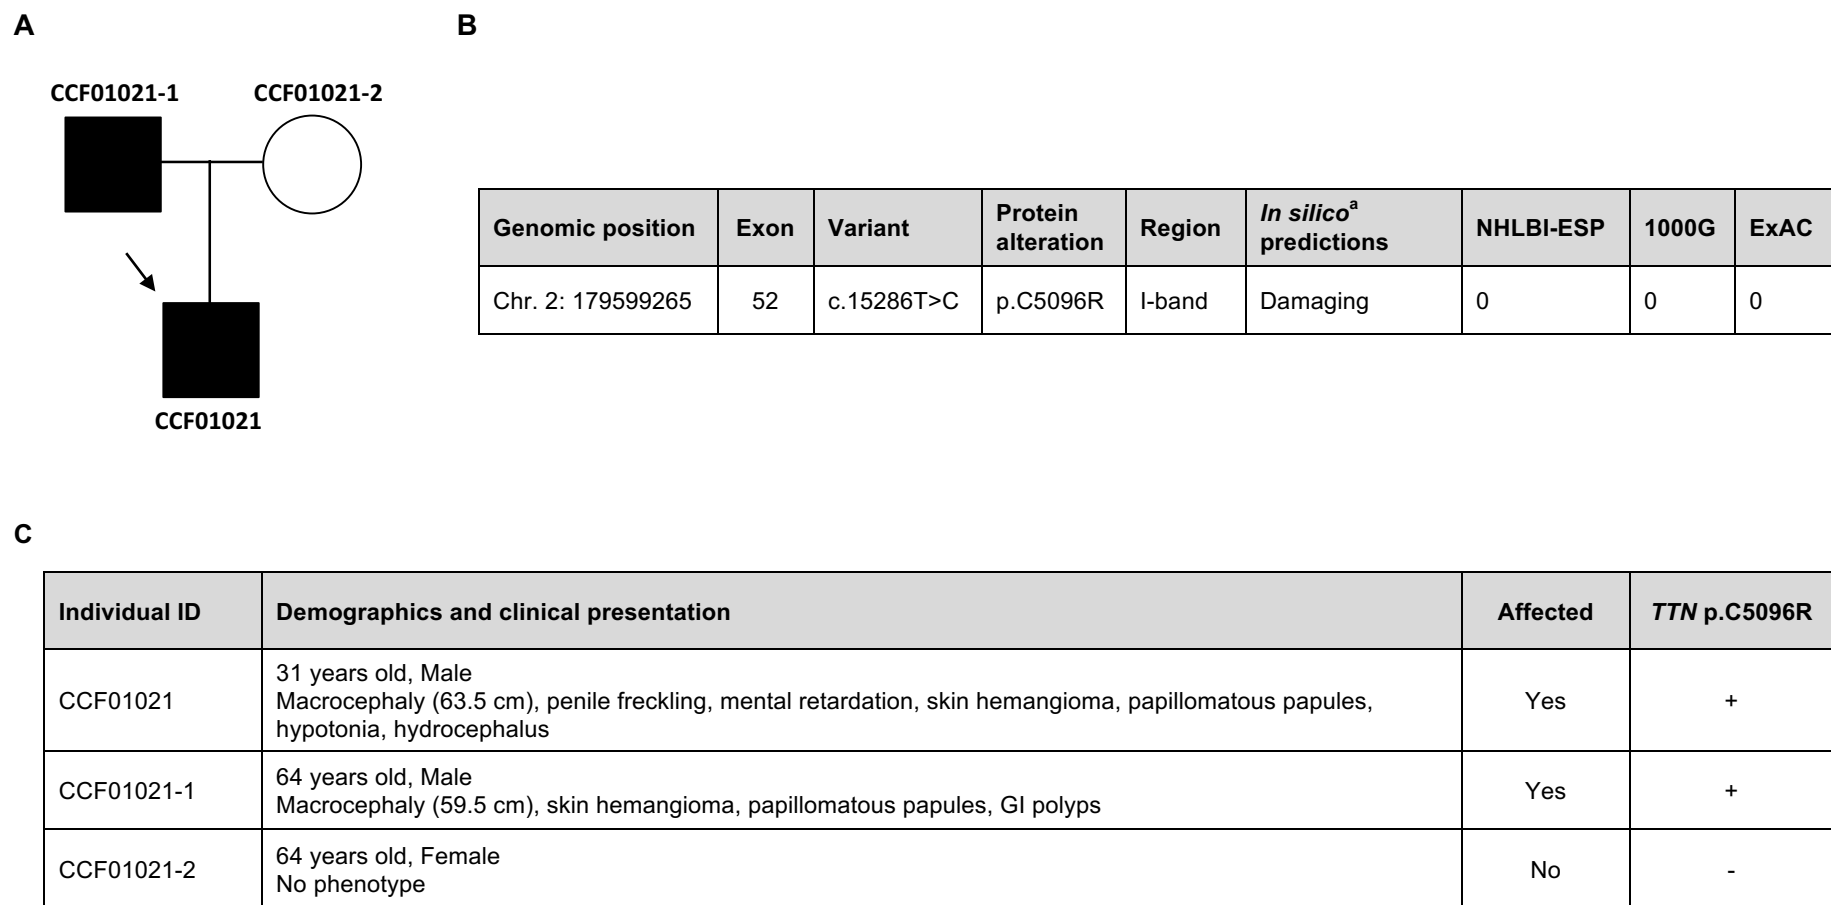

(A) Pedigree of trio from Family CCF01021. Black color indicates affected status. (B) Characteristics of the *TTN* p.C5096R variant identified in the proband (CCF01021). (C) Demographic and clinical characteristics of the trio from Family CCF01021. The proband shares the same variant allele from the affected father (CCF01021-1).

<sup>a</sup>Predicted through a combination of SIFT, MutationTaster, and PolyPhen-2 (see Materials and Methods).

**Supplementary Figure 2.** Sanger sequencing for genotyping CRISPR/Cas9 genome-edited HEK293T cells for the *TTN* c.15286T>C, p.C5096R variant

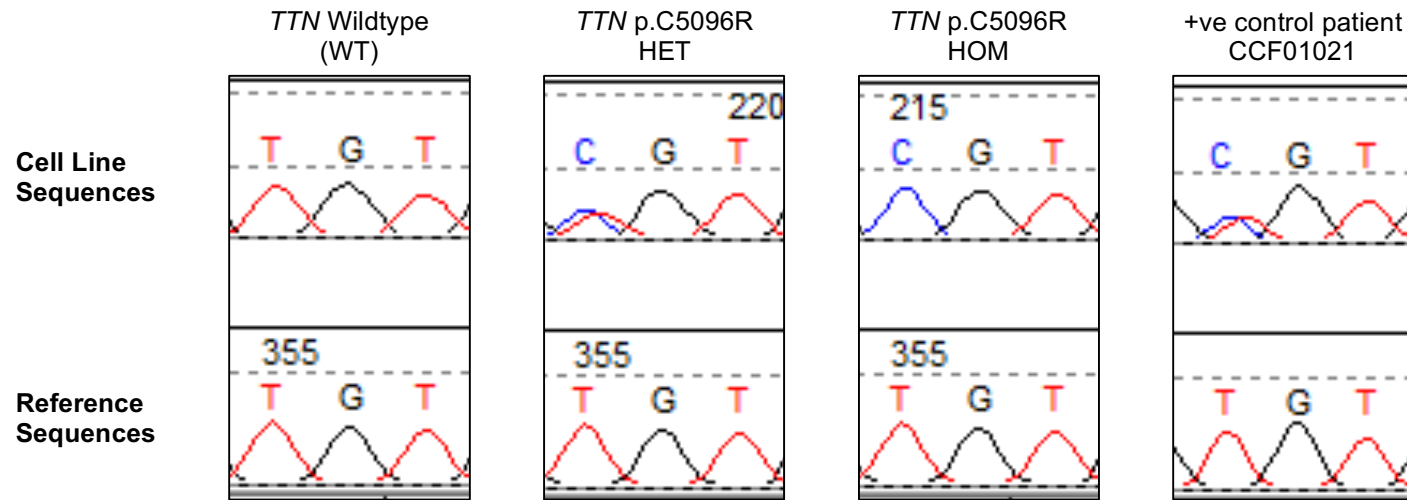

The *TTN* variant NM\_001267550:c.15286T>C, p.C5096R was introduced in HEK293T cells via CRISPR/Cas9 genome editing (see Materials and Methods). Genotyping was done using PCR-based region-specific Sanger sequencing. Blood DNA from patient CCF01021 harboring the same variant was used as a positive control.

**Supplementary Figure 3.** Lack of contact inhibition cellular phenotype is apparent in HEK293T cells harboring the *TTN* p.C5096R variant

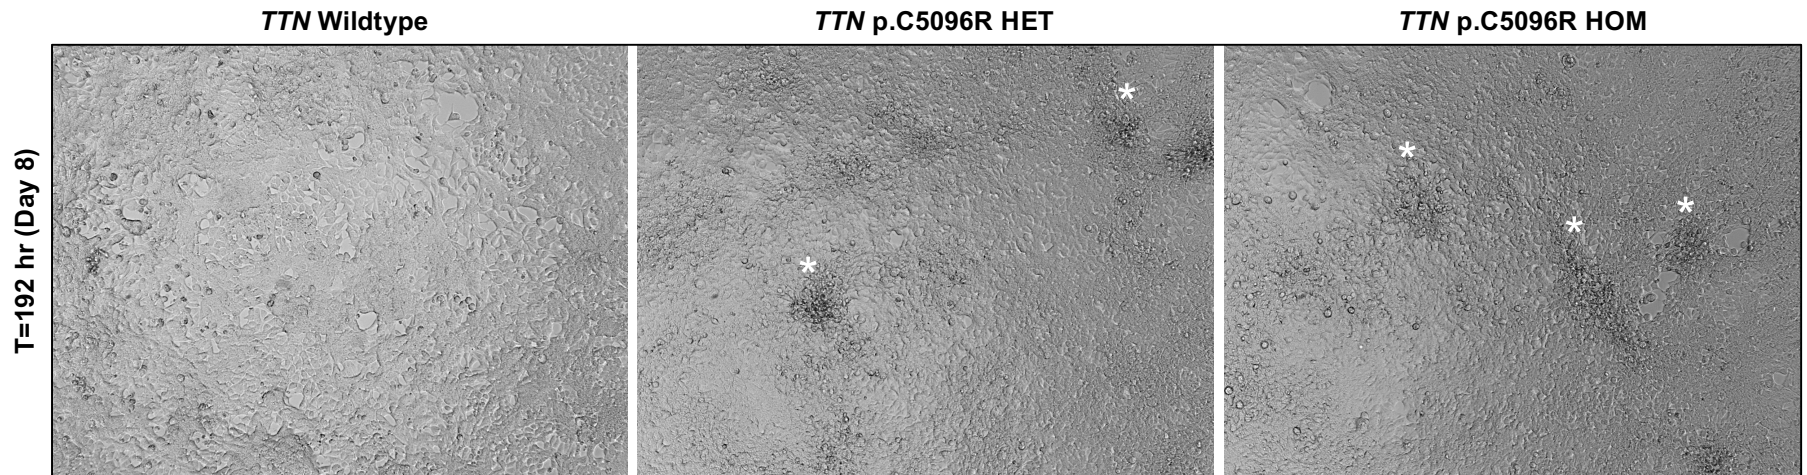

Differences in growth pattern become apparent after cells reach confluence, with mutant *TTN* p.C5096R HET and *TTN* p.C5096R HOM cells showing increased growth compared to wildtype. Foci of cells growing on top of each other are notably apparent in *TTN*-mutant cells (\*). Images were taken using a Leica DMI3000B manual inverted microscope (Leica, Buffalo Grove, IL).

**Supplementary Figure 4.** Mutant *TTN* p.C5096R cells do not show differences in cell viability or migration

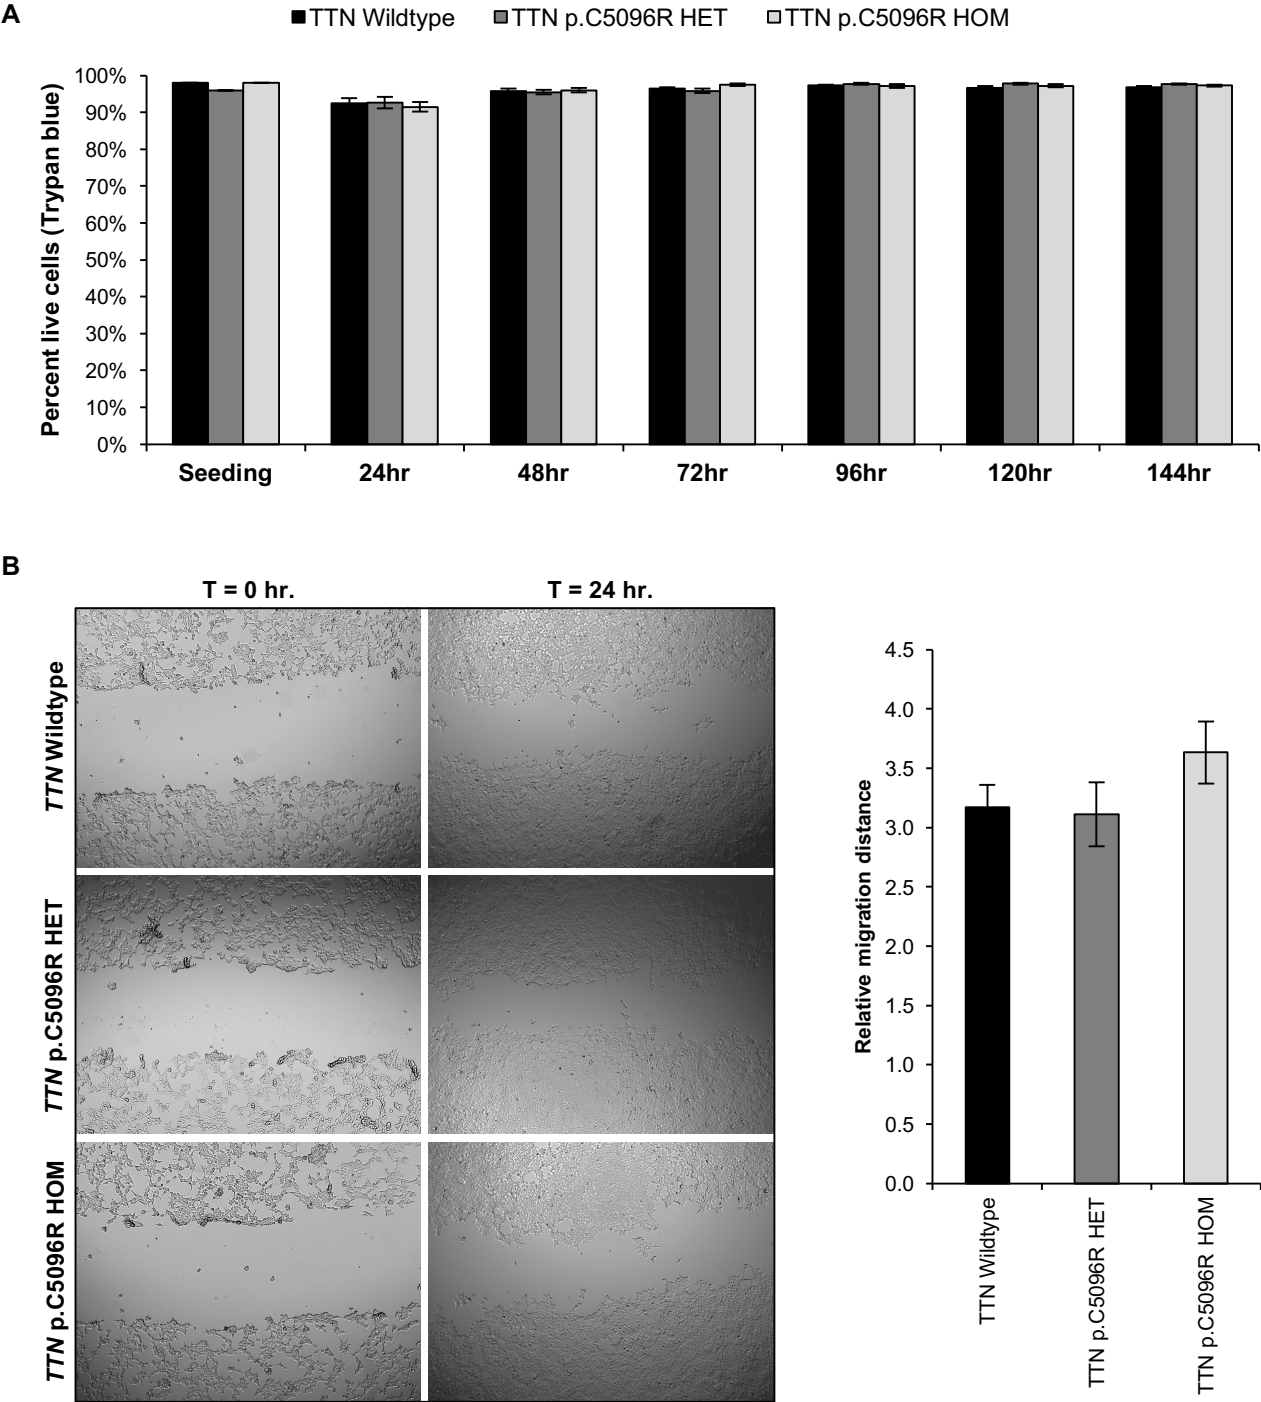

**(A)** Wildtype and mutant cells were counted for up to 144 hours post seeding. Trypan blue stain was used to count dead cells and assess viability. Experiment was done in 4 biological replicates, counted at least in triplicates at each time point. Data in figure is representative of pooled replicates; data presented as means  $\pm$  SEM. **(B)** Scratches were done 24 hours after cell seeding and migration distance measured after 24 hours. Representative of 3 technical replicates; data presented as means  $\pm$  SEM.



**Supplementary Figure 5: Spectrum of *TTN* mutations in skeletal muscle titinopathies**

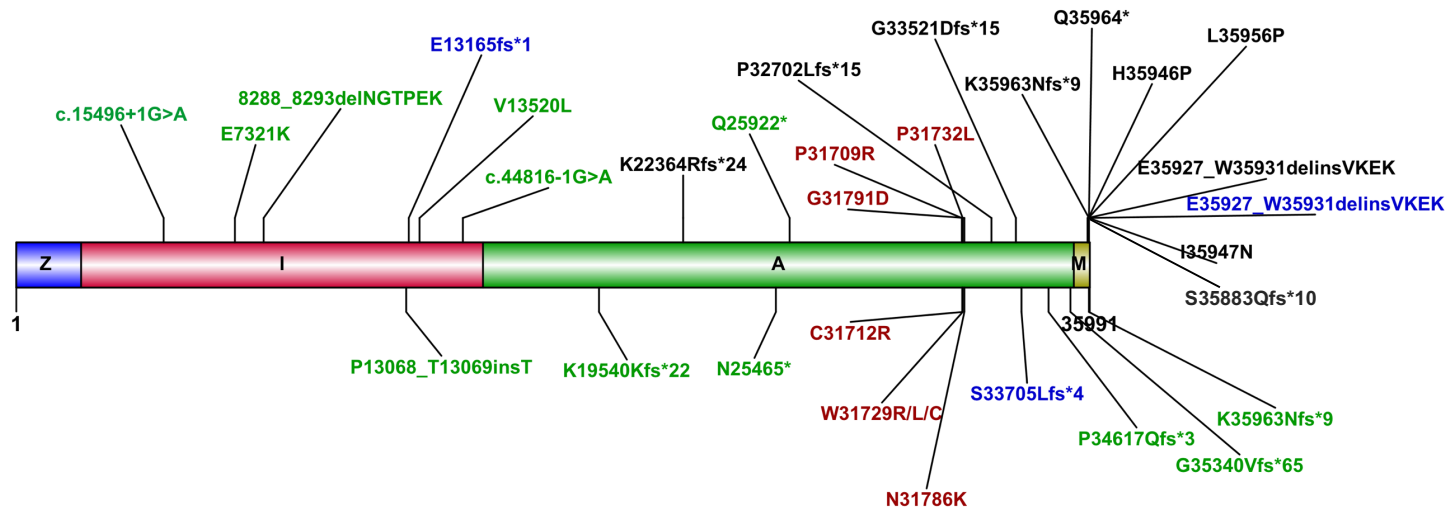

**TMD:** tibial muscular dystrophy

**LGMD2J:** limb-girdle muscular dystrophy type 2J

**HMERF:** hereditary myopathy with early respiratory failure

**CNM:** centronuclear myopathy

Representative of *TTN* skeletal muscle disease-causing (pathogenic or likely pathogenic) mutations extracted from Chauveau et al. *Human Mutation*. 2014;35(9):1046-1059. Mutations are depicted according to the canonical full-length IC *TTN* transcript NM\_001267550. TMD is an autosomal dominant disease presenting with heterozygous *TTN* mutations. Severe cases present with homozygous or compound heterozygous mutations. All depicted *TTN* mutations in LGMD2J are homozygous or compound heterozygous. HMERF *TTN* mutations are all heterozygous except for Pro31732Leu, which was homozygous. All depicted *TTN* mutations in CNM are compound heterozygous.

## Supplementary Figure 6: Spectrum of *TTN* mutations in cardiac muscle titinopathies

### A. Dilated Cardiomyopathy (DCM)

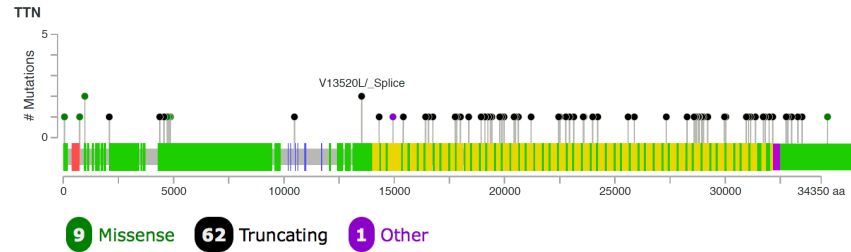

### B. Arrhythmogenic Right Ventricular Cardiomyopathy (ARVC)

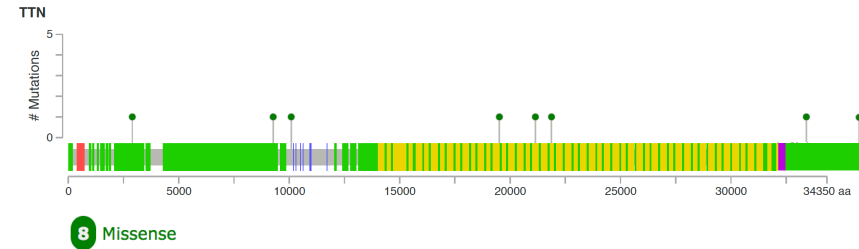

### C. Hypertrophic Cardiomyopathy (HCM)

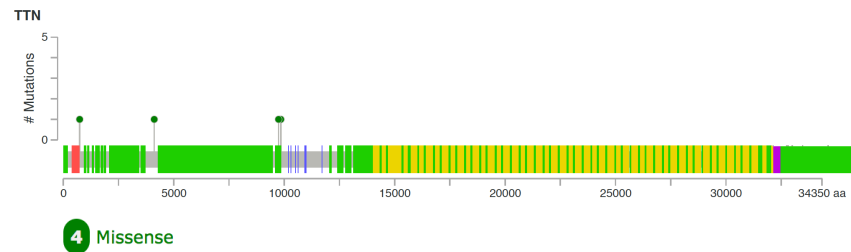

### D. Restrictive Cardiomyopathy (RCM)

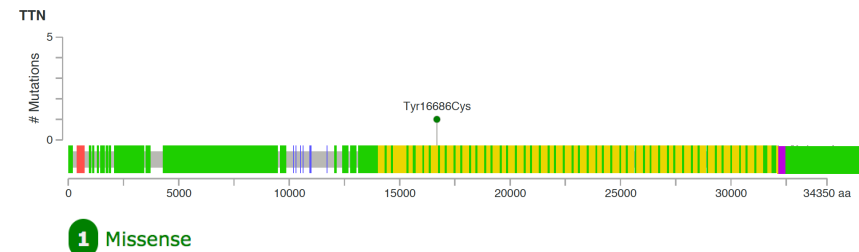

Representative of *TTN* cardiac muscle disease-causing (pathogenic or likely pathogenic) mutations extracted from Chauveau et al. *Human Mutation*. 2014;35(9):1046-1059. Mutations are depicted according to the canonical full-length IC *TTN* transcript NM\_001267550. The legend term “other” in DCM (A) refers to a p.Pro14940\_Thr19283dup mutation (duplication). DCM: homozygous, heterozygous, or compound heterozygous; ARVC: heterozygous or compound heterozygous; HCM: heterozygous; RCM: heterozygous. Lollipop plots were constructed using cBioPortal MutationMapper v1.0.1 ([http://www.cbioportal.org/mutation\\_mapper.jsp](http://www.cbioportal.org/mutation_mapper.jsp)).

## Supplementary Figure 7: Spectrum of *TTN* mutations in combined skeletal/cardiac muscle titinopathies

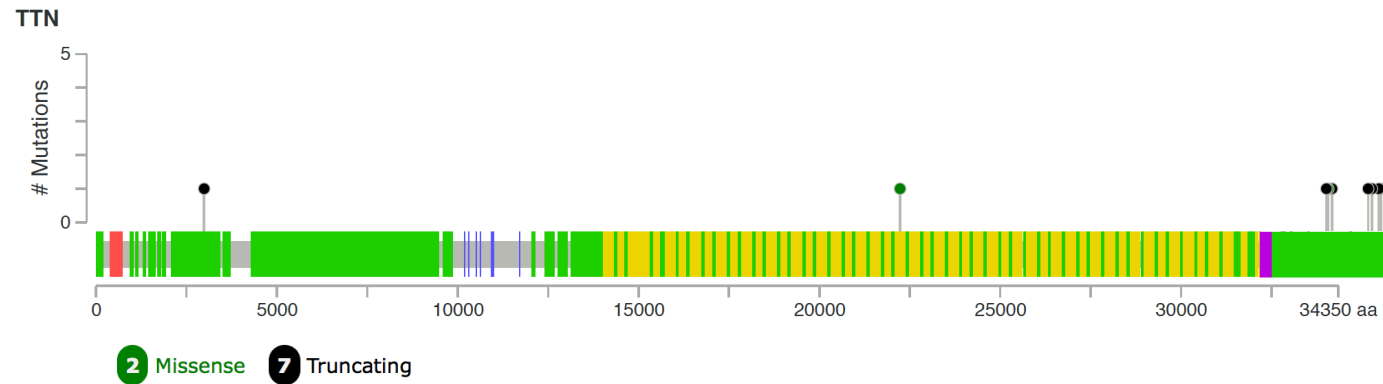

Representative of *TTN* combined skeletal/cardiac muscle disease-causing (pathogenic or likely pathogenic) mutations extracted from Chauveau et al. *Human Mutation*. 2014;35(9):1046-1059. Mutations identified in multi-minicore disease with heart disease (MmD-HD) are depicted according to the canonical full-length IC *TTN* transcript NM\_001267550. All mutations are homozygous or compound heterozygous. Lollipop plots were constructed using cBioPortal MutationMapper v1.0.1 ([http://www.cbioportal.org/mutation\\_mapper.jsp](http://www.cbioportal.org/mutation_mapper.jsp)).

**Supplementary Figure 8. TITIN-Interactome from BioGRID**

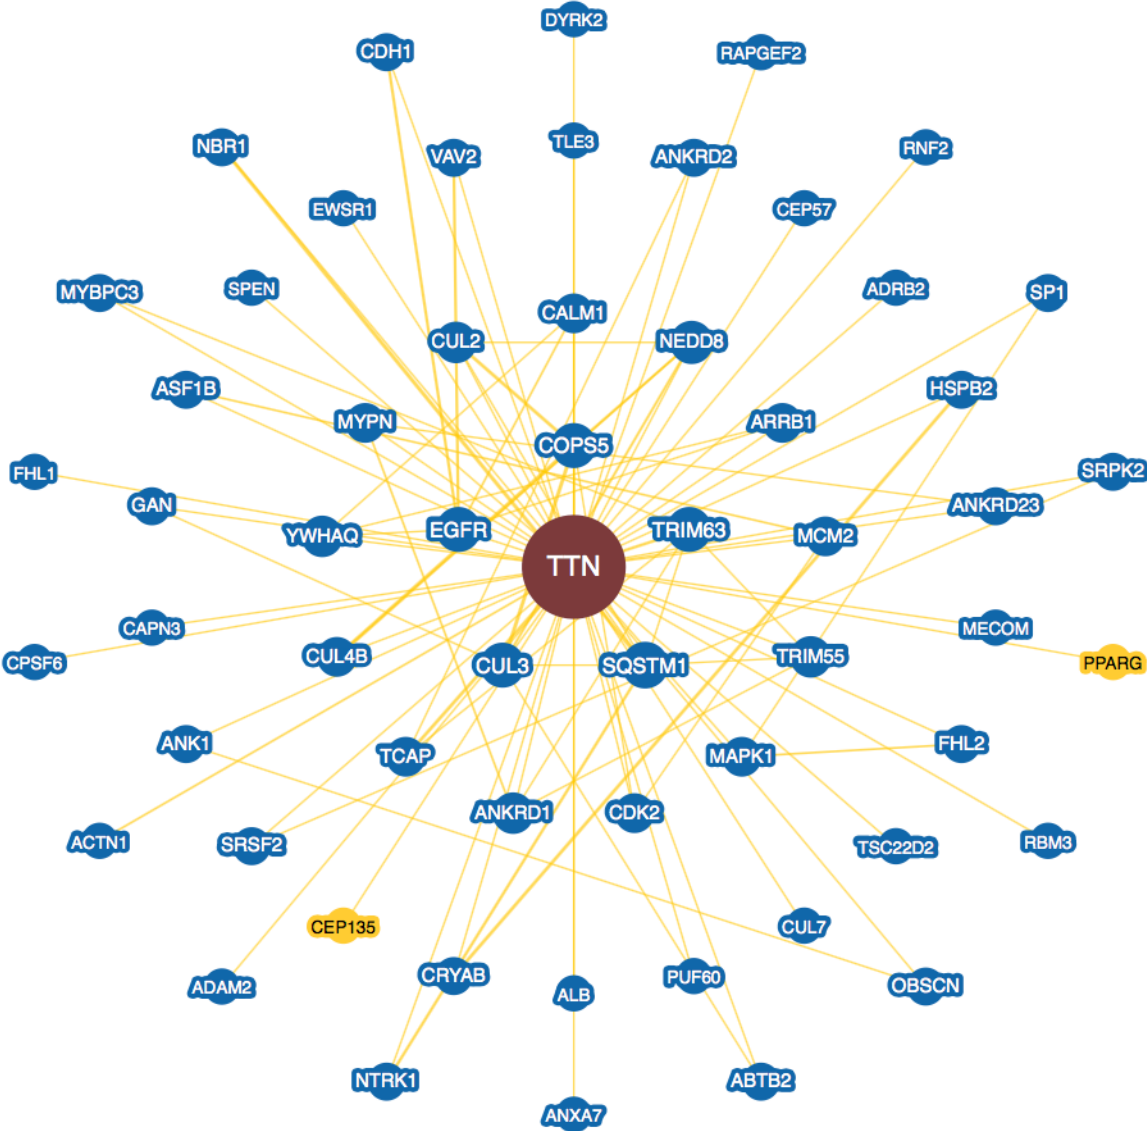

|                                                                                       |                                                                           |
|---------------------------------------------------------------------------------------|---------------------------------------------------------------------------|
| <span style="color: #800000;">●</span> Query Gene                                     | <span style="color: #000080;">●</span> Associated Gene from Same Organism |
| <span style="color: #FFD700;">●</span> Associated Gene from Different Organism        | <span style="color: #008000;">●</span> Associated Chemical                |
| <span style="color: #008000;">—</span> Association with Genetic Evidence              | <span style="color: #FFD700;">—</span> Association with Physical Evidence |
| <span style="color: #800080;">—</span> Association with Genetic and Physical Evidence | <span style="color: #000080;">—</span> Association with Chemical          |

\*\* Greater node size represents increased connectivity and thicker edge sizes represent increased evidence supporting the association.

Data was extracted from the BioGRID database (<https://thebiogrid.org/113124/summary/homo-sapiens/ttn.html>), last accessed on November 5, 2017.

**Supplementary Figure 9.** Full scans of Western blots presented in the main figures

**Fig. 2B**

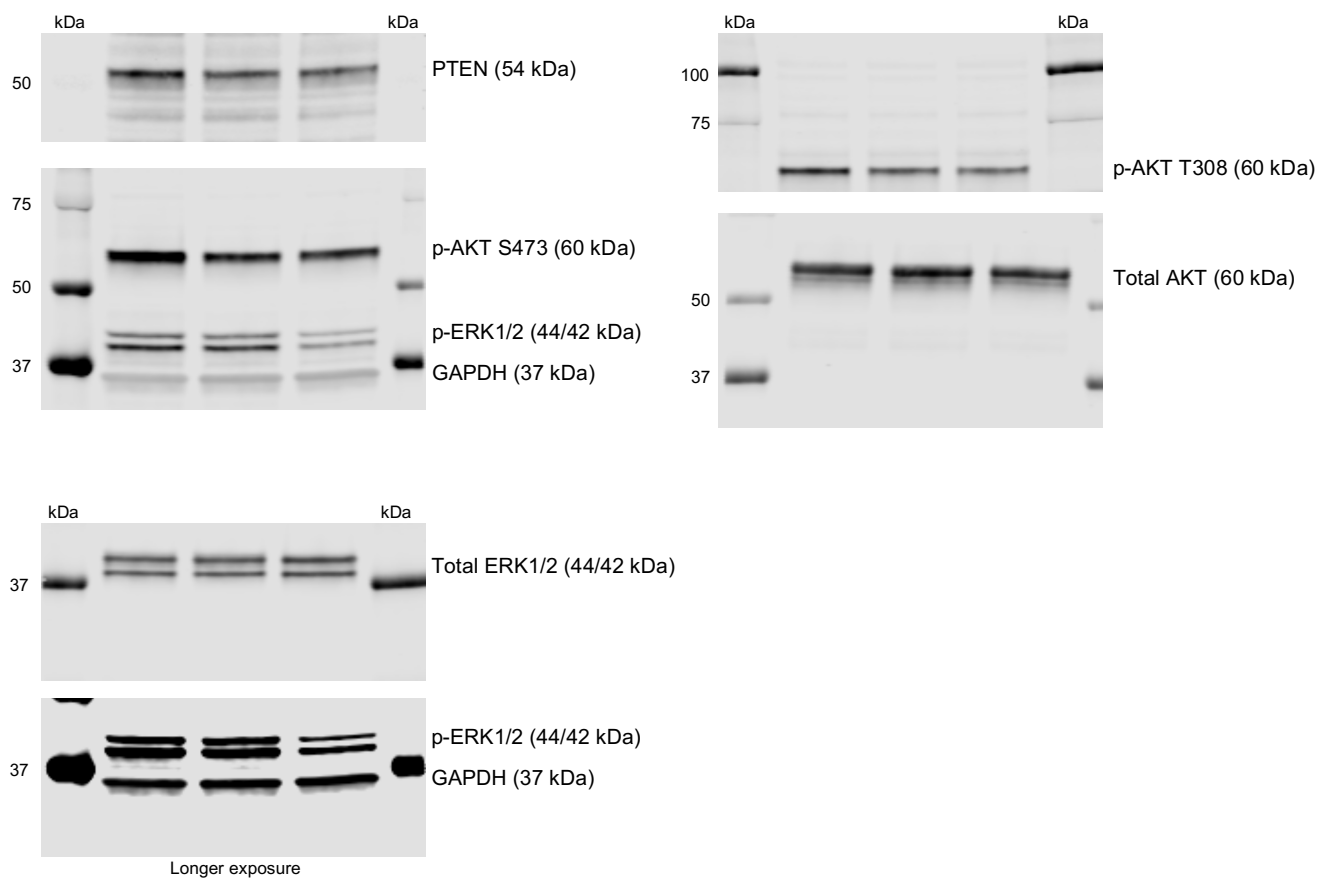

**Fig. 2C**

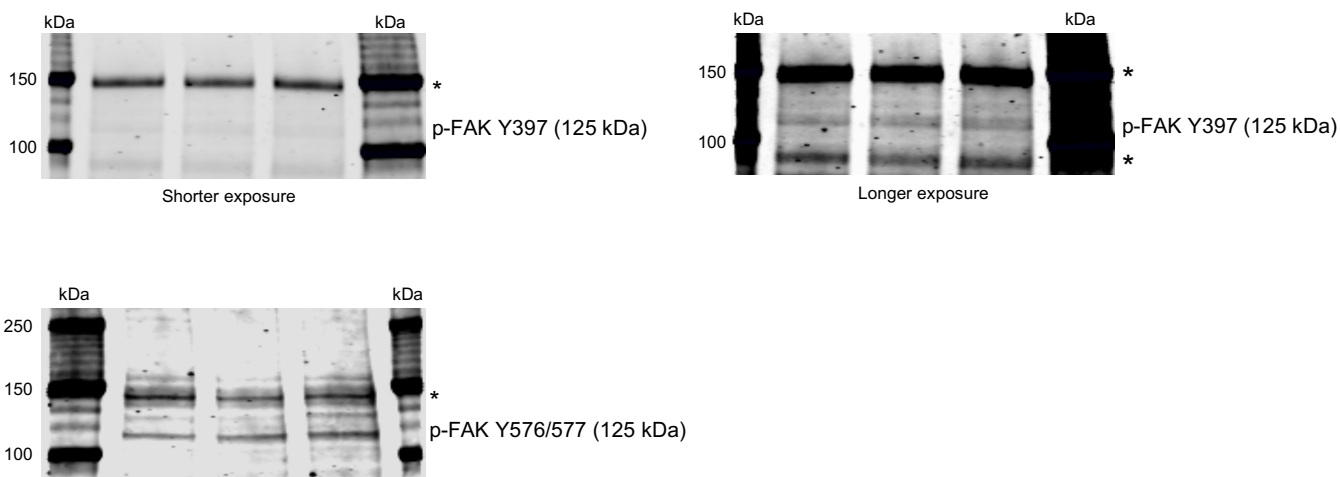

**Supplementary Figure 9.** Full scans of Western blots presented in the main figures (continued)

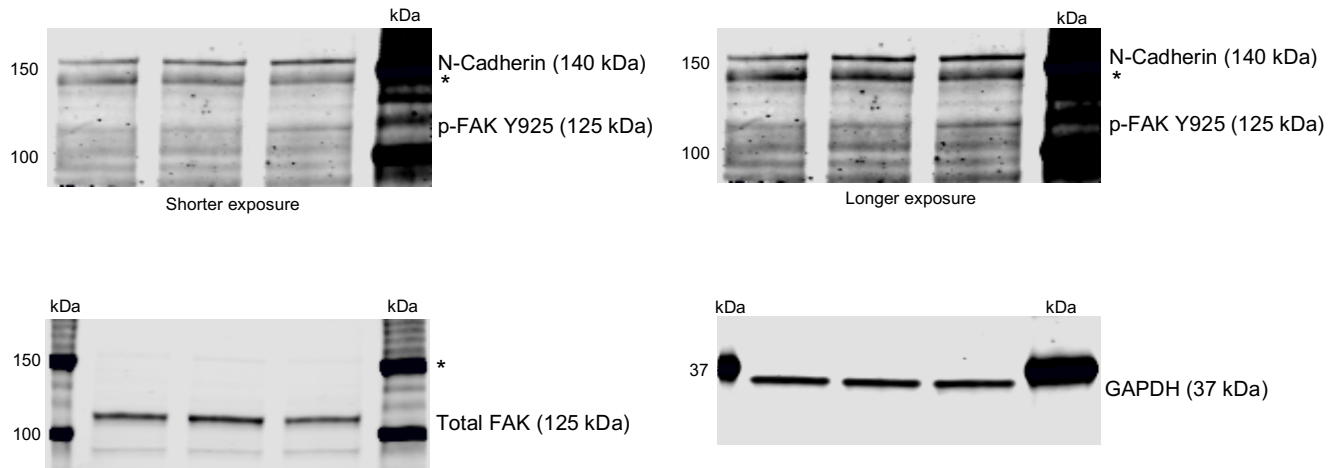

Three lanes denote protein lysates from HEK293T cells that are *TTN* wildtype, heterozygous *TTN* p.C5096R HET, and homozygous *TTN* p.C5096R HOM, respectively. Standard protein ladders (Precision Plus Protein™ Kaleidoscope™ Prestained Protein Standards BioRad #1610375) were used to denote size in kilo Daltons (kDa). Blots were scanned digitally using the Odyssey Infrared Imaging System (Li-Cor Biosciences).

For each experiment, all genotypes were run in parallel on the same gel. Antibodies include: anti-PTEN (Cascade Bioscience clone 6H2.1) at 1:2000, anti-phospho-AKT S473 (Cell Signaling #4060) at 1:1000, anti-phospho-AKT T308 (Cell Signaling #2965) at 1:1000, anti-total AKT (Cell Signaling #9272) at 1:1000, anti-phospho-ERK1/2 (Cell Signaling #9101) at 1:1000, anti-ERK1/2 (Cell Signaling #9102) at 1:1000, anti-phospho-FAK Y397 (Cell Signaling #8556) at 1:1000, anti-phospho-FAK Y576/577 (Cell Signaling #3281) at 1:1000, anti-phospho-FAK Y925 (Cell Signaling #3284) at 1:1000, anti-FAK (Cell Signaling #13009) at 1:1000, and anti-GAPDH (Cell Signaling #2118) at 1:40,000 dilutions.

Expected molecular weight in kDa of each protein is indicated in parentheses. N-Cadherin was probed for in an exploratory analysis of other relevant proteins beyond the scope of this manuscript. FAK and phospho-FAK (p-FAK) antibodies result in a non-specific band at ~140 kDa (indicated as \*).
